# Supplementary material for: Assessing the Genetic Identity of Tuscan Sweet Chestnut (Castanea sativa Mill.)
Source: MDPI journal article supplement (doi:10.3390/f13070967), 2022-06-21
Supplement: s1 [file s1]

## SUPPLEMENTARY MATERIAL

### Parameter Estimate

Demographic parameters were drawn with the following distributions: lognormal (mean = 300; SD = 250) for demographic event times of all species and log-normal (mean = 1000; SD = 1000) for current or ancestral effective population sizes. We simulated SSRs using a generalized stepwise-mutation model [1–2] with two parameters: the mean mutation rate ( $\mu_{SSR}$ ) and the mean of the geometric distribution of the probability of being a one-step mutation ( $P$ ) were drawn, respectively, from Uniform [ $10^{-5}$ ;  $10^{-3}$ ] and Uniform [0.1; 0.3] hyperprior distributions. Each locus was characterized by individual  $\mu_i$  and  $P_i$  values, respectively, drawn from Gamma (mean = mean  $\mu_{SSR}$ ; shape = 2) and Gamma (mean =  $P$ ; shape = 2) prior distributions. Coalescent modelling was applied to SSR data, using DIYABC version 2.1.0 [3], on the ancestral genetic clusters identified by STRUC-TURE. The summary statistics computed for SSR loci were as follows: mean number of alleles, gene diversity [4] and allele size variance. These summary statistics are influenced by demographic changes [2–5]. We simulated 1,000,000 data sets for each scenario. In the ‘scenario choice’ approach, we estimated posterior probabilities  $P$  using a logistic regression method [6] on 1%–5% simulations closest to observed statistics.

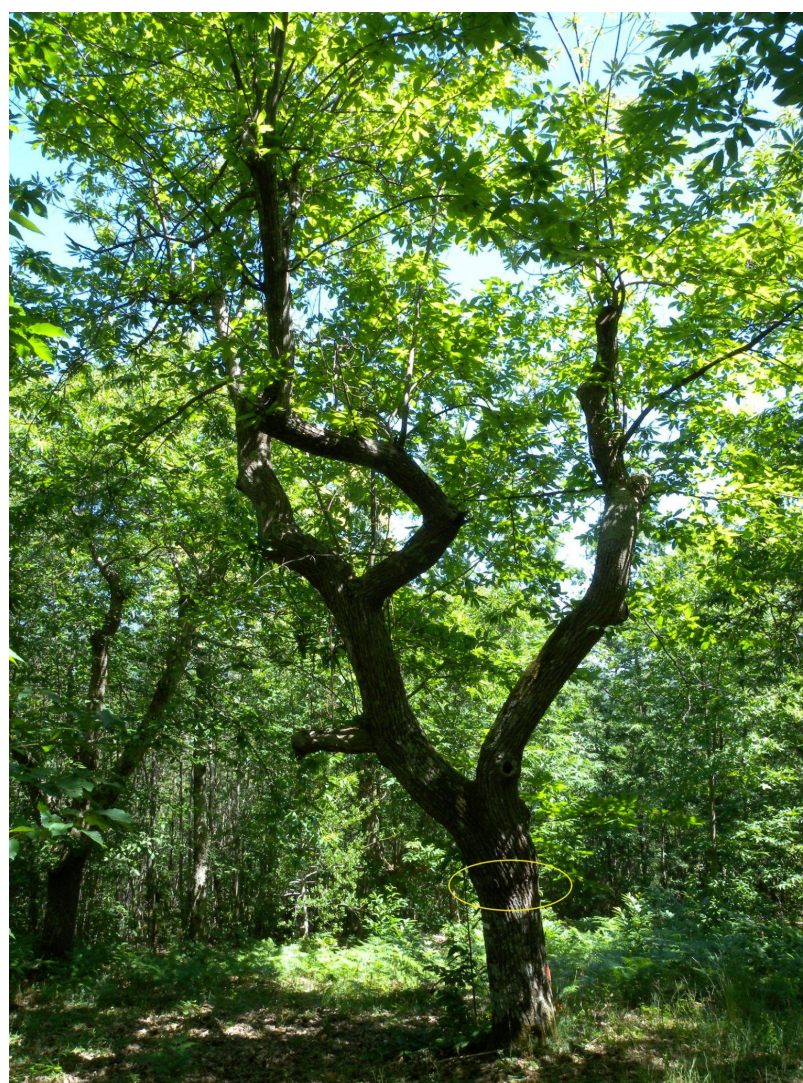

**Figure S1.** Grafted chestnut tree. The circle highlights the scar where the grafting occurred, roughly one meter above the ground.

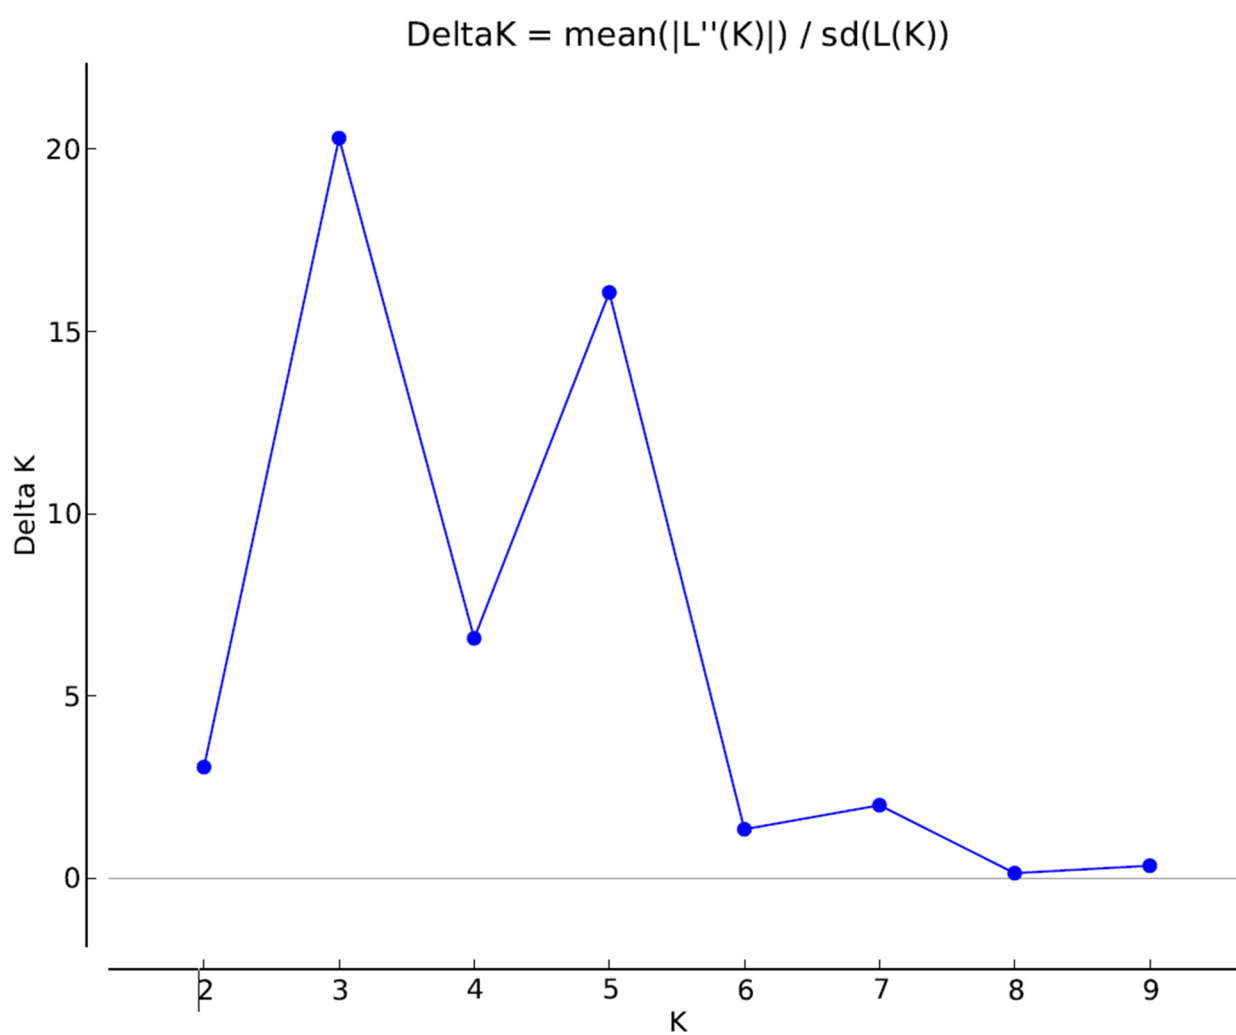

**Figure S2.** Graphical  $\Delta K$  representation of the estimated probability of data for each K-value from K = 2 to K = 9. Admixture model with LOCPRIOR, 50,000 MCMC iterations and a 10,000 iterations burn-in period.

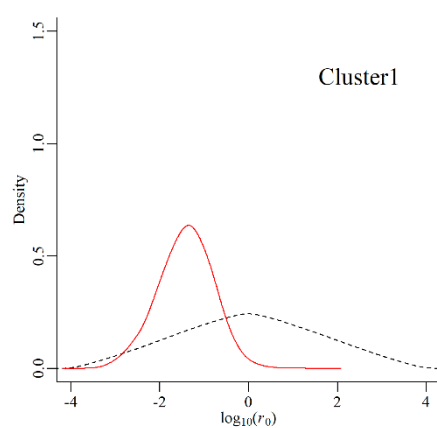

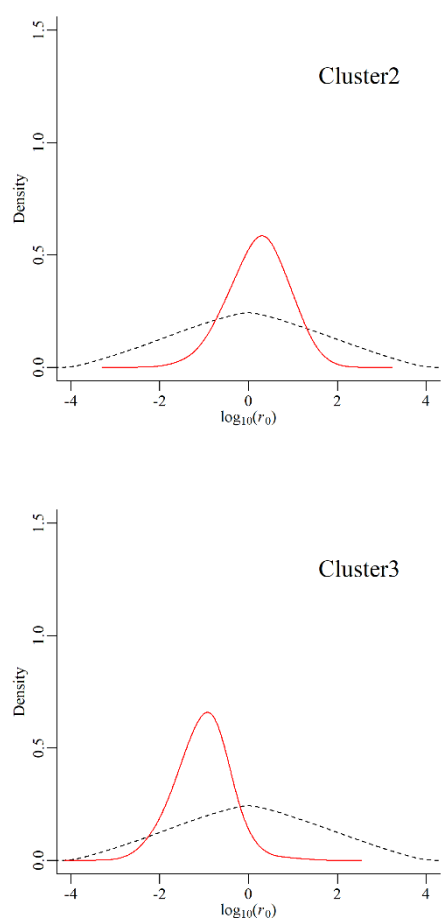

**Figure S3.** Density distributions obtained by the ABC approach of posterior estimates of the ratio ( $r_0$ ) of present ( $N_0\mu$ ) and past ( $N_1\mu$ ) diversity population index. Clusters 1, 2 and 3 correspond to the homogeneous genetic clusters obtained by STRUCTURE analysis (see text for details). Dashed lines are prior distributions, the full red lines are posterior distributions.

**Table S1.** Local names of trees sampled for this work, ordered by area. G = Garfagnana, CM = Colline Metallifere, MA = Monte Amiata.

| #ID | G            | #ID | CM                        | #ID | MA                             |
|-----|--------------|-----|---------------------------|-----|--------------------------------|
| 1   | Balocca      | 35  | Rossolina_A               | 76  | Luccichente piancastagnaio     |
| 2   | Bonosora_B   | 36  | Tardiva_A                 | 77  | Luccichente                    |
| 3   | Bonosora_D   | 37  | Luccichente_B             | 78  | Luccichente campofiera         |
| 4   | Bonosora_E   | 38  | Maronessa_B               | 79  | Bellone                        |
| 5   | Bonosora_G   | 39  | Rossolina_B               | 80  | Marrone lorenzo                |
| 6   | Capannaccia  | 40  | Lombarda_B                | 81  | Marrone podruccio seggiano     |
| 7   | Capannaccina | 41  | Marrone del piano_A       | 82  | Marrone amamopoli seggiano     |
| 8   | Cardaccia_B  | 42  | Bellona_A                 | 83  | Marrone                        |
| 9   | Cardaccia_C  | 43  | Domestica_A               | 84  | Marrone di campiglia           |
| 10  | Cardaccia_D  | 44  | Marrone della madonnina_A | 85  | Ceciolandis                    |
| 11  | Carpinese_C  | 45  | Bionda_A                  | 86  | Bastarda Rossa                 |
| 12  | Carpinese_D  | 46  | Marrone del lago_A        | 87  | Cecio                          |
| 13  | Cesarucca    | 47  | Morella_A                 | 88  | Cecio maccherini               |
| 14  | Insetina     | 48  | Marrone del lago_C        | 89  | Cecio loccasemarchi            |
| 15  | Lucignana_9d | 49  | Marrone della madonnina_B | 90  | Bastarda Rossa pieve di lamula |
| 16  | Lucignana_A  | 50  | 21                        | 91  | Rosso linobetteri              |
| 17  | Marrone_A    | 51  | Carpinese_A               | 92  | Bastarda rossa pozzi           |
| 18  | Marrone_D    | 52  | Marrone montegusciani_B   | 93  | Bigione                        |
| 19  | Marrone_F    | 53  | Domestica_C               | 94  | S. Matteo pioli                |

|    |            |    |                         |     |                                   |
|----|------------|----|-------------------------|-----|-----------------------------------|
| 20 | Mazzangaia | 54 | Rossolina_C             | 95  | Culobianco_1                      |
| 21 | Mozza      | 55 | Domestica_B             | 96  | Culobianco_2                      |
| 22 | Nerona     | 56 | Marronedicagna_A        | 97  | Domestica abbazia s. salvatore    |
| 23 | Pelosora   | 57 | Bionda_C                | 98  | Domestica campofiera              |
| 24 | Pelosorona | 58 | Carpinese_B             | 99  | Pastinese                         |
| 25 | Pontecosa  | 59 | Carpinese_D             | 100 | Marrone loc. corsini              |
| 26 | Rossola_A  | 60 | Marrone montegusciani_D | 101 | Domestico pozzi                   |
| 27 | Rossola_E  | 61 | Pastinese_B             | 102 | Bastarda Rossa podruccio seggiano |
| 28 | Rossola_C  | 62 | Marrone montegusciani_C |     |                                   |
| 29 | Rossola_D  | 63 | Marrone di torniella_A  |     |                                   |
| 30 | Rossola_B  | 64 | Pastinese_A             |     |                                   |
| 31 | Santina_A  | 65 | Incognito               |     |                                   |
| 32 | Santina_B  | 66 | Luccichente_A           |     |                                   |
| 33 | Santina_C  | 67 | Lombarda_A              |     |                                   |
| 34 | Selvana    | 68 | Marrone della madonna_A |     |                                   |
|    |            | 69 | Bionda_B                |     |                                   |
|    |            | 70 | Marrone del lago_B      |     |                                   |
|    |            | 71 | Bellona_B               |     |                                   |
|    |            | 72 | Monumentale san martino |     |                                   |
|    |            | 73 | Marronessa_A            |     |                                   |
|    |            | 74 | Carpinese_C             |     |                                   |
|    |            | 75 | Morella_B               |     |                                   |

**Table S2.** Local names of trees sampled for this work, ordered by gene cluster of provenance after analysis by STRUCTURE. “Marroni” trees are present in all clusters.

| #ID | Cluster 1 (Red in Figure 2) | #ID | Cluster 2 (Green in Figure 2)  | #ID | Cluster 3 (Blue in Figure 2)      |
|-----|-----------------------------|-----|--------------------------------|-----|-----------------------------------|
| 1   | Balocca                     | 42  | Bellona_A                      | 50  | 21                                |
| 2   | Bonosora_B                  | 71  | Bellona_B                      | 86  | Bastarda Rossa                    |
| 3   | Bonosora_D                  | 93  | Bigione                        | 90  | Bastarda Rossa pieve di lamula    |
| 4   | Bonosora_E                  | 45  | Bionda_A                       | 102 | Bastarda Rossa podruccio seggiano |
| 5   | Bonosora_G                  | 69  | Bionda_B                       | 92  | Bastarda rossa pozzi              |
| 6   | Capannaccia                 | 57  | Bionda_C                       | 79  | Bellone                           |
| 7   | Capannaccina                | 51  | Carpinese_A                    | 87  | Cecio                             |
| 8   | Cardaccia_B                 | 58  | Carpinese_B                    | 89  | Cecio loccasemarchi               |
| 9   | Cardaccia_C                 | 74  | Carpinese_C                    | 88  | Cecio maccherini                  |
| 10  | Cardaccia_D                 | 59  | Carpinese_D                    | 85  | Ceciolandis                       |
| 11  | Carpinese_C                 | 95  | Culobianco_1                   | 53  | Domestica_C                       |
| 12  | Carpinese_D                 | 96  | Culobianco_2                   | 67  | Lombarda_A                        |
| 13  | Cesarucca                   | 97  | Domestica abbazia s. salvatore | 83  | Marrone                           |
| 14  | Insetina                    | 98  | Domestica campofiera           | 82  | Marrone amamopoli seggiano        |
| 15  | Lucignana_9d                | 43  | Domestica_A                    | 46  | Marrone del lago_A                |
| 16  | Lucignana_A                 | 55  | Domestica_B                    | 41  | Marrone del piano_A               |
| 18  | Marrone_D                   | 101 | Domestico pozzi                | 68  | Marrone della madonna_A           |
| 19  | Marrone_F                   | 65  | Incognito                      | 49  | Marrone della madonnina_B         |
| 20  | Mazzangaia                  | 40  | Lombarda_B                     | 84  | Marrone di campiglia              |
| 21  | Mozza                       | 77  | Luccichente                    | 100 | Marrone loc. corsini              |
| 22  | Nerona                      | 78  | Luccichente campofiera         | 80  | Marrone lorenzo                   |
| 23  | Pelosora                    | 76  | Luccichente piancastagnaio     | 62  | Marrone montegusciani_C           |
| 24  | Pelosorona                  | 66  | Luccichente_A                  | 60  | Marrone montegusciani_D           |
| 25  | Pontecosa                   | 37  | Luccichente_B                  | 81  | Marrone podruccio seggiano        |
| 26  | Rossola_A                   | 38  | Maronessa_B                    | 17  | Marrone_A                         |
| 27  | Rossola_E                   | 70  | Marrone del lago_B             | 56  | Marronedicagna_A                  |
| 28  | Rossola_C                   | 48  | Marrone del lago_C             | 91  | Rosso linobetteri                 |
| 29  | Rossola_D                   | 44  | Marrone della madonnina_A      | 39  | Rossolina_B                       |

---

|    |           |    |                         |
|----|-----------|----|-------------------------|
| 30 | Rossola_B | 63 | Marrone di torniella_A  |
| 31 | Santina_A | 52 | Marrone montegusciani_B |
| 32 | Santina_B | 73 | Marronessa_A            |
| 33 | Santina_C | 72 | Monumentale san martino |
| 34 | Selvana   | 47 | Morella_A               |
|    |           | 75 | Morella_B               |
|    |           | 99 | Pastinese               |
|    |           | 64 | Pastinese_A             |
|    |           | 61 | Pastinese_B             |
|    |           | 35 | Rossolina_A             |
|    |           | 54 | Rossolina_C             |
|    |           | 94 | S. Matteo pioli         |
|    |           | 36 | Tardiva_A               |

---

## References:

1. Zhivotovsky, L.A.; Feldman, M.W.; Grishchkin, S.A. Biased mutations and microsatellite variation. *Molecular Biology and Evolution* **1997**, Volume 14, Issue 9, Pages 926–933. <https://doi.org/10.1093/oxfordjournals.molbev.a025835>.
2. Estoup, A.; Jarne, P.; Cornuet, J. M. Homoplasy and mutation model at microsatellite loci and their consequences for population genetics analysis. *Molecular ecology* **2002**, 11(9), 1591–1604.
3. Cornuet, J.M.; Santos, F.; Beaumont, M.A. Inferring population history with DIYABC: a user-friendly approach to approximate Bayesian computation. *Bioinformatics* **2008**, 24, 2731–2719.
4. Nei, M. Estimation of average heterozygosity and genetic distance from a small number of individuals. *Genetics* **1978**, 89, 583–590.
5. Tajima, F. Statistical method for testing the neutral mutation hypothesis by DNA polymorphism. *Genetics*, **1989**, 123, 585–595.
6. Ghirotto, S.; Mona, S.; Benazzo, A.; Paparazzo, F.; Caramelli, D.; Barbujani, G. Inferring genealogical processes from patterns of Bronze-Age and modern DNA variation in Sardinia. *Molecular biology and evolution*, **2010**, 27(4), 875–886.
